# Supplementary material for: Origination of the Split Structure of Spliceosomal Genes from Random Genetic Sequences
Source: PubMed Central journal article supplement (PMC2565106; doi:10.1371/journal.pone.0003456), 2008-10-20

## SUPPLEMENTARY FIGURE

**FIGURE S1: Comparison of the Exon-ORF Plots (EOPs) of representative genes from *H. sapiens*, *C. elegans*, *P. falciparum*, *S. pombe*, and *E. coli* with random DNA ORF plots.** The ORF distribution patterns in the three RFs of each gene sequence and its corresponding spliced gene sequence were mapped. The exons and the spliced coding-sequence were overlaid on the appropriate ORF and on the RF in which they occurred. For each gene, the gene details are summarized in a table above the plots. A control reference ORF distribution pattern for a computer-generated random DNA of the same length of each example gene was plotted to enable immediate visual comparison (top plot). The plots shown for each gene are: the ORF plot of the split-gene with overlaid exons (middle left), the spliced gene with overlaid complete coding-sequence (middle right), the ARF plot of the unspliced split-gene (bottom left) and the ARF plot of the spliced-gene sequence (bottom right).

## Introduction to the Plots

### Representative mammalian (*H. sapiens*) genes

EOPs of 12 representative human genes are displayed on pp. 3-14. We found that human gene sequences were remarkably similar to random DNA, with nearly all (99.97%) of their ORFs (vs. 99.99% of random ORFs) being shorter than 750 bases and 99.13% (vs. 99.83% of random ORFs) being shorter than 300 bases. The ARFs (amino acid reading-frames; the distances between any three non-stop codons) in human genes also exhibited random characteristics. Our analysis revealed that the vast majority of exons in human genes (98%) are shorter than 750 bases, and >92% are shorter than 300 bases. Very rarely did human exons not conform to the random sequence model. Note that the human genes are also highly intron dense, having an average of 8 introns per gene.

# Exon ORF Plot for Gene CP

[Genome: Homo sapiens]

[Gene Name: ceruloplasmin (ferroxidase)]

|                      |                 |     |                    |     |                     |     |     |     |     |     |     |     |     |     |     |     |     |     |    |
|----------------------|-----------------|-----|--------------------|-----|---------------------|-----|-----|-----|-----|-----|-----|-----|-----|-----|-----|-----|-----|-----|----|
| Gene ID: <b>1356</b> | Gene Symbol: CP |     | Gene Length: 48204 |     | Number of Exons: 19 |     |     |     |     |     |     |     |     |     |     |     |     |     |    |
| Exon                 | 1               | 2   | 3                  | 4   | 5                   | 6   | 7   | 8   | 9   | 10  | 11  | 12  | 13  | 14  | 15  | 16  | 17  | 18  | 19 |
| Length               | 146             | 248 | 213                | 174 | 255                 | 172 | 140 | 153 | 212 | 151 | 213 | 208 | 140 | 129 | 107 | 217 | 140 | 163 | 17 |

**Total Spliced Exon Length: 3198**

TAA: | TGA: | TAG: | Exon: |

## Random Sequence ORF

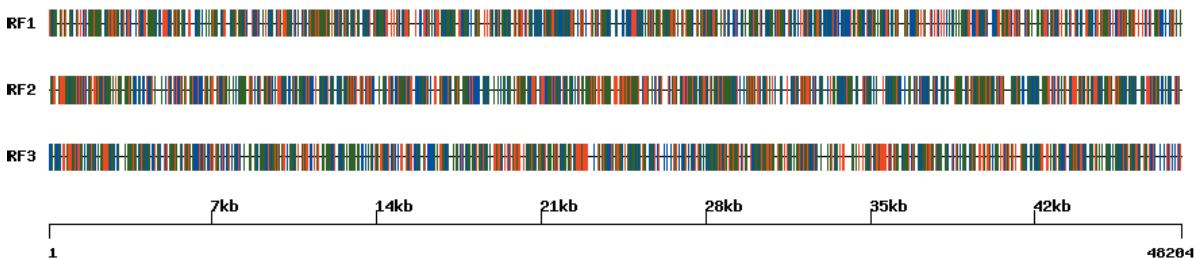

## Exon ORF (Before Splicing)

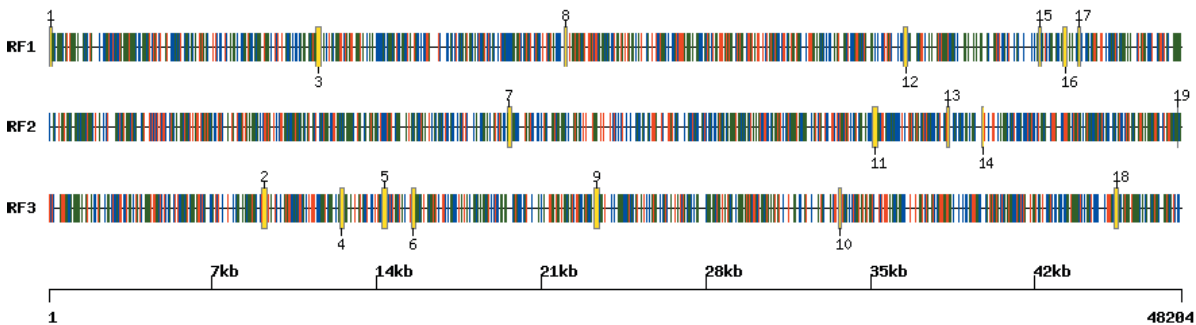

## Exon ORF (After Splicing)

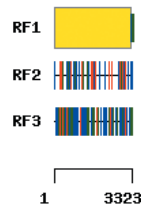

GTT : | ACA : | CTG : |

## Exon ARF (Before Splicing)

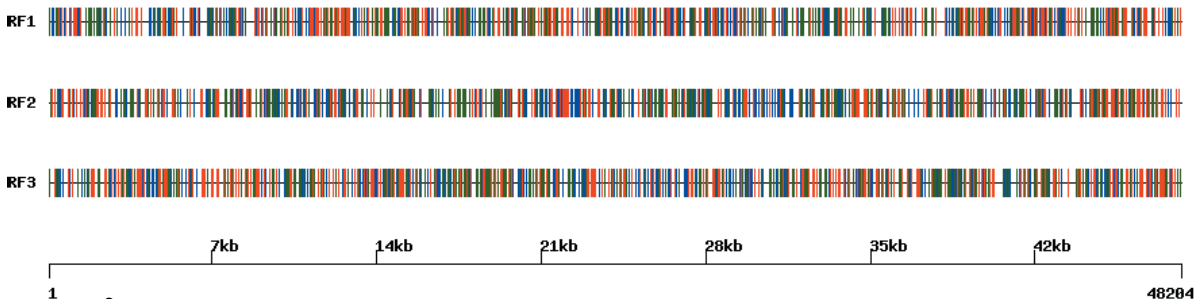

## Exon ARF (After Splicing)

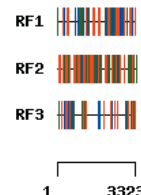

# Exon ORF Plot for Gene GALC

[Genome: Homo sapiens]

[Gene Name: galactosylceramidase precursor]

|                      |                   |    |    |     |     |    |                    |     |     |     |    |    |                     |     |     |    |     |
|----------------------|-------------------|----|----|-----|-----|----|--------------------|-----|-----|-----|----|----|---------------------|-----|-----|----|-----|
| Gene ID: <b>2581</b> | Gene Symbol: GALC |    |    |     |     |    | Gene Length: 60484 |     |     |     |    |    | Number of Exons: 17 |     |     |    |     |
| Exon                 | 1                 | 2  | 3  | 4   | 5   | 6  | 7                  | 8   | 9   | 10  | 11 | 12 | 13                  | 14  | 15  | 16 | 17  |
| Length               | 147               | 69 | 64 | 114 | 140 | 39 | 131                | 156 | 125 | 128 | 90 | 87 | 151                 | 181 | 164 | 77 | 147 |

**Total Spliced Exon Length: 2010**

TAA: | TGA: | TAG: | Exon: |

## Random Sequence ORF

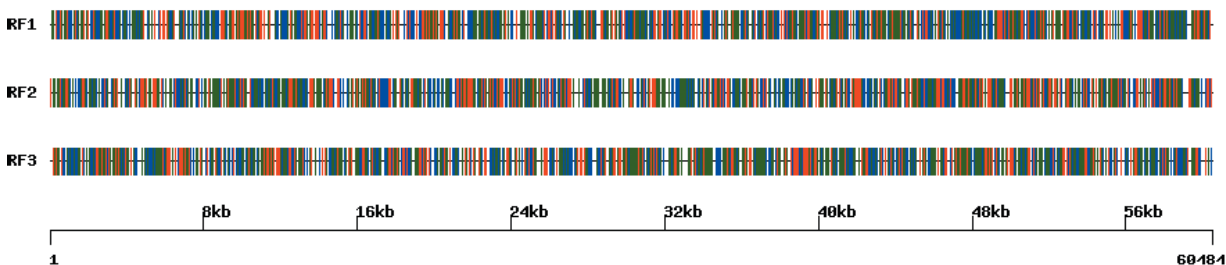

## Exon ORF (Before Splicing)

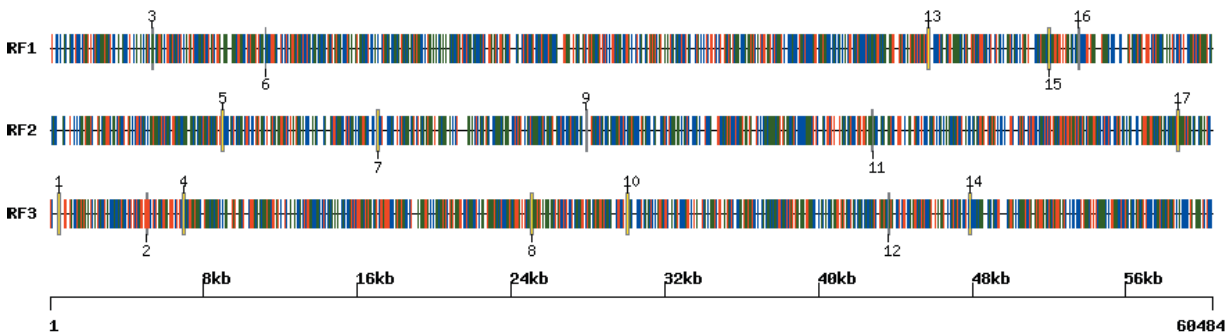

## Exon ORF (After Splicing)

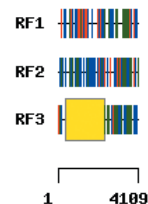

GTT : | ACA : | CTG : |

## Exon ARF (Before Splicing)

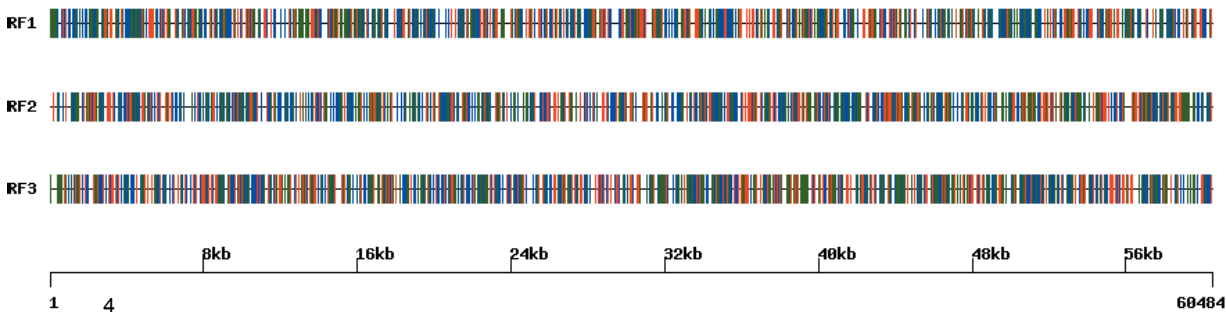

## Exon ARF (After Splicing)

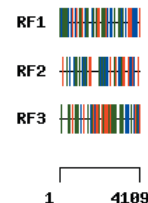

# Exon ORF Plot for Gene CARD10

[Genome: Homo sapiens]

[Gene Name: caspase recruitment domain protein 10]

| Gene ID: <b>29775</b> | Gene Symbol: CARD10 |     |     |     |     |     |     |     |     |    | Gene Length: 28811 |     |     |     |    | Number of Exons: 20 |     |     |     |     |
|-----------------------|---------------------|-----|-----|-----|-----|-----|-----|-----|-----|----|--------------------|-----|-----|-----|----|---------------------|-----|-----|-----|-----|
| Exon                  | 1                   | 2   | 3   | 4   | 5   | 6   | 7   | 8   | 9   | 10 | 11                 | 12  | 13  | 14  | 15 | 16                  | 17  | 18  | 19  | 20  |
| Length                | 235                 | 138 | 326 | 210 | 156 | 126 | 192 | 135 | 116 | 29 | 124                | 160 | 112 | 244 | 70 | 103                 | 159 | 116 | 113 | 235 |

**Total Spliced Exon Length: 3099**

TAA: | TGA: | TAG: | Exon: |

## Random Sequence ORF

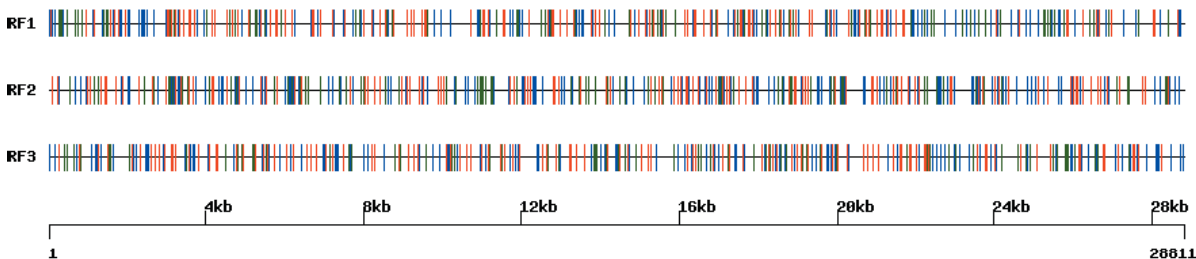

## Exon ORF (Before Splicing)

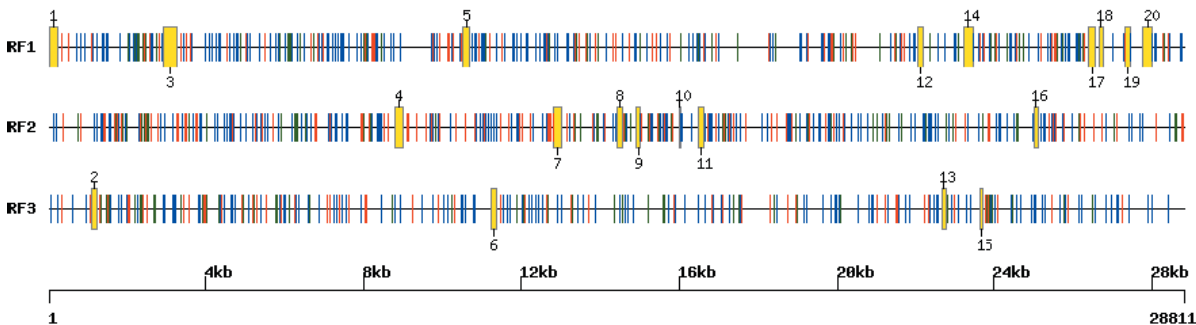

## Exon ORF (After Splicing)

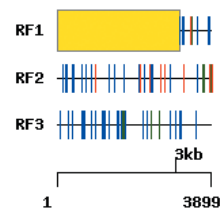

GTT : | ACA : | CTG : |

## Exon ARF (Before Splicing)

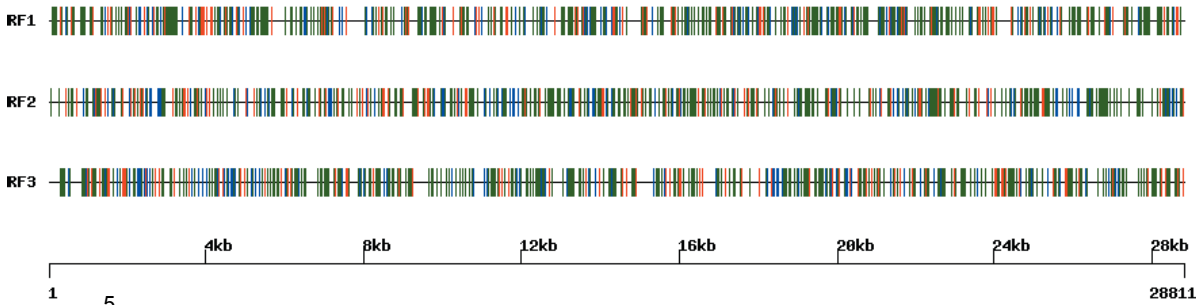

## Exon ARF (After Splicing)

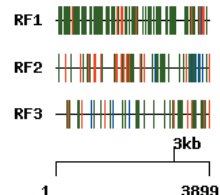

# Exon ORF Plot for Gene HADHA

[Genome: Homo sapiens]

[Gene Name: hydroxyacyl dehydrogenase, subunit A]

| Gene ID:    | Gene Symbol: |    |    |     |     |     |     |     |     |    | Gene Length: |     |     |    |     | Number of Exons: |     |     |     |     |
|-------------|--------------|----|----|-----|-----|-----|-----|-----|-----|----|--------------|-----|-----|----|-----|------------------|-----|-----|-----|-----|
| <b>3030</b> | HADHA        |    |    |     |     |     |     |     |     |    | 53981        |     |     |    |     | 20               |     |     |     |     |
| Exon        | 1            | 2  | 3  | 4   | 5   | 6   | 7   | 8   | 9   | 10 | 11           | 12  | 13  | 14 | 15  | 16               | 17  | 18  | 19  | 20  |
| Length      | 67           | 42 | 71 | 134 | 139 | 120 | 103 | 123 | 119 | 57 | 110          | 135 | 172 | 87 | 141 | 69               | 196 | 115 | 146 | 146 |

**Total Spliced Exon Length: 2292**

TAA: | TGA: | TAG: | Exon: |

## Random Sequence ORF

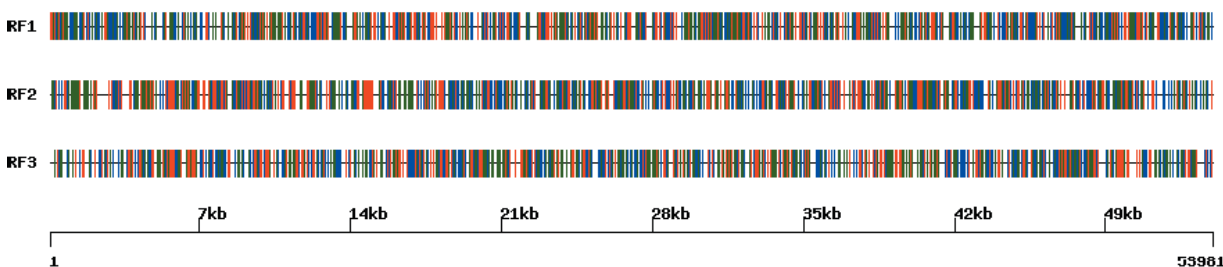

## Exon ORF (Before Splicing)

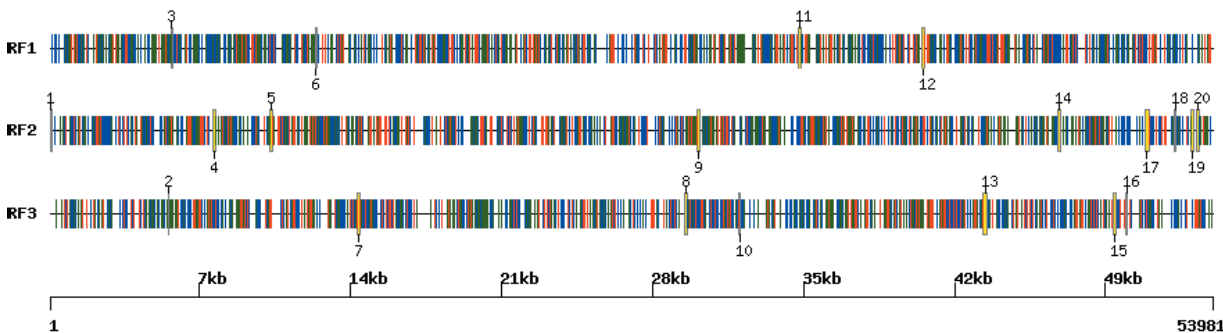

## Exon ORF (After Splicing)

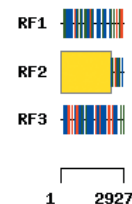

GTT : | ACA : | CTG : |

## Exon ARF (Before Splicing)

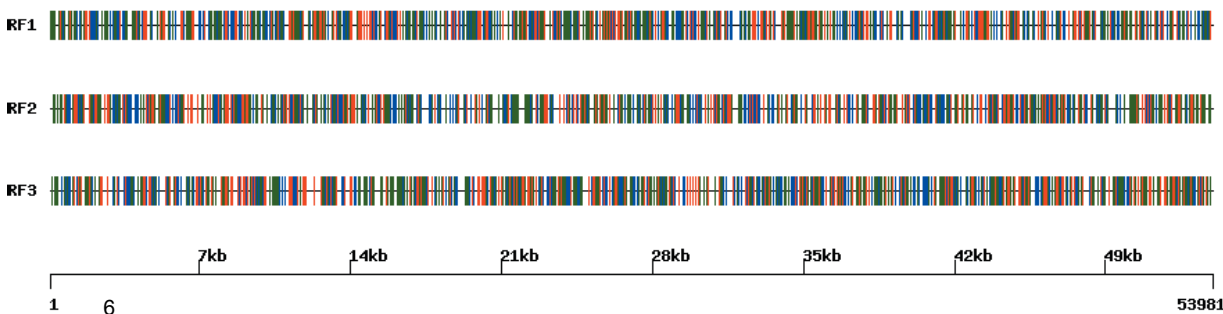

## Exon ARF (After Splicing)

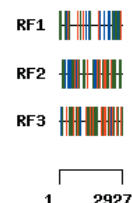

# Exon ORF Plot for Gene HK2

[Genome: Homo sapiens]

[Gene Name: hexokinase 2]

|                      |                  |     |     |     |    |     |     |     |                    |     |     |     |    |     |     |     |                     |     |
|----------------------|------------------|-----|-----|-----|----|-----|-----|-----|--------------------|-----|-----|-----|----|-----|-----|-----|---------------------|-----|
| Gene ID: <b>3099</b> | Gene Symbol: HK2 |     |     |     |    |     |     |     | Gene Length: 60700 |     |     |     |    |     |     |     | Number of Exons: 18 |     |
| Exon                 | 1                | 2   | 3   | 4   | 5  | 6   | 7   | 8   | 9                  | 10  | 11  | 12  | 13 | 14  | 15  | 16  | 17                  | 18  |
| Length               | 63               | 163 | 149 | 120 | 96 | 100 | 184 | 156 | 234                | 305 | 149 | 120 | 96 | 100 | 184 | 156 | 234                 | 145 |

**Total Spliced Exon Length: 2754**

TAA: | TGA: | TAG: | Exon: |

## Random Sequence ORF

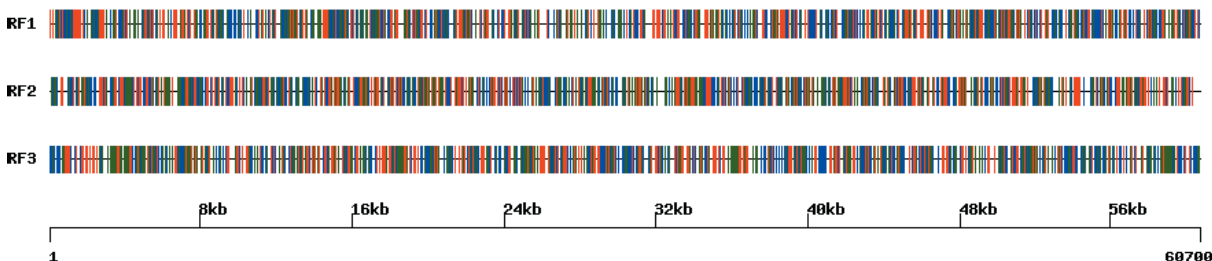

## Exon ORF (Before Splicing)

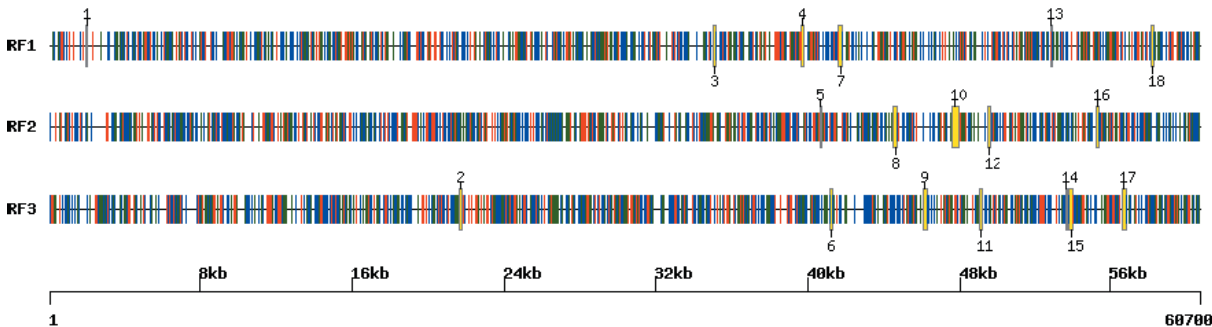

## Exon ORF (After Splicing)

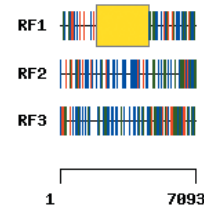

GTT : | ACA : | CTG : |

## Exon ARF (Before Splicing)

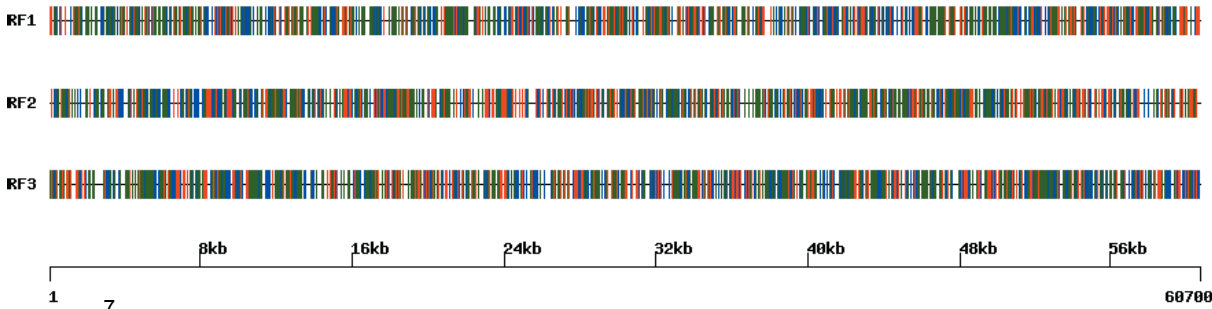

## Exon ARF (After Splicing)

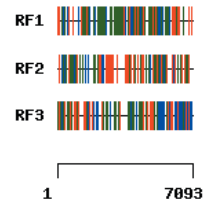

# Exon ORF Plot for Gene CIITA

[Genome: Homo sapiens]

[Gene Name: class II transactivator]

|                      |                    |     |    |    |    |    |     |     |     |    |                    |     |    |    |                     |    |    |    |    |
|----------------------|--------------------|-----|----|----|----|----|-----|-----|-----|----|--------------------|-----|----|----|---------------------|----|----|----|----|
| Gene ID: <b>4261</b> | Gene Symbol: CIITA |     |    |    |    |    |     |     |     |    | Gene Length: 47784 |     |    |    | Number of Exons: 19 |    |    |    |    |
| Exon                 | 1                  | 2   | 3  | 4  | 5  | 6  | 7   | 8   | 9   | 10 | 11                 | 12  | 13 | 14 | 15                  | 16 | 17 | 18 | 19 |
| Length               | 52                 | 147 | 96 | 63 | 78 | 45 | 147 | 144 | 165 | 69 | 1651               | 159 | 72 | 81 | 93                  | 87 | 84 | 84 | 76 |

**Total Spliced Exon Length: 3393**

TAA: | TGA: | TAG: | Exon: |

## Random Sequence ORF

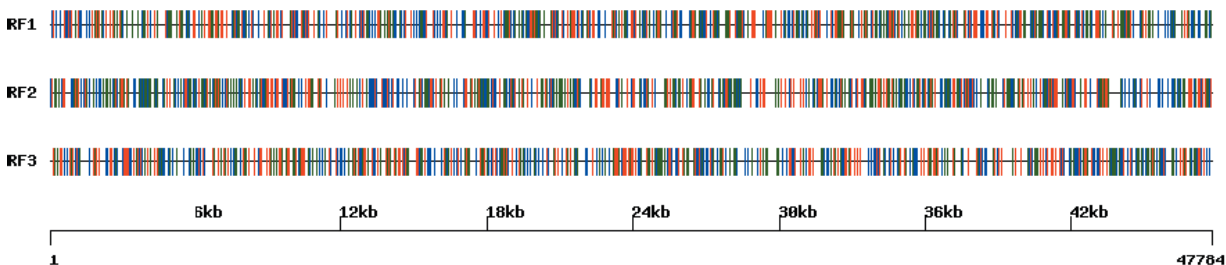

## Exon ORF (Before Splicing)

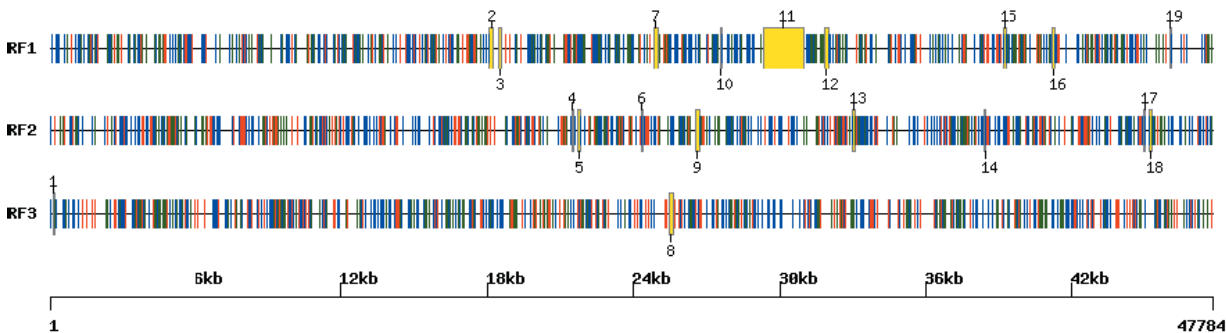

## Exon ORF (After Splicing)

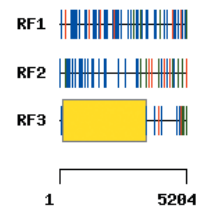

GTT : | ACA : | CTG : |

## Exon ARF (Before Splicing)

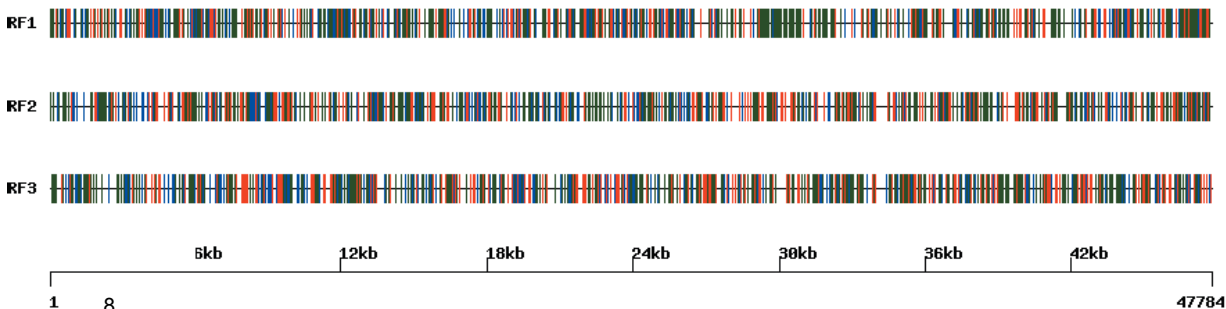

## Exon ARF (After Splicing)

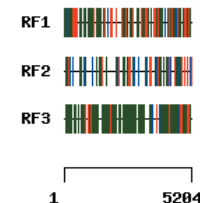



# Exon ORF Plot for Gene ABCB10

[Genome: Homo sapiens]

[Gene Name: ATP-binding cassette, sub-family B, member 10]

Gene ID: **23456**      Gene Symbol: ABCB10      Gene Length: 42113      Number of Exons: 13

| Exon   | 1   | 2   | 3   | 4   | 5   | 6   | 7  | 8   | 9  | 10  | 11 | 12 | 13  |
|--------|-----|-----|-----|-----|-----|-----|----|-----|----|-----|----|----|-----|
| Length | 517 | 201 | 203 | 135 | 147 | 136 | 96 | 210 | 80 | 181 | 44 | 35 | 232 |

**Total Spliced Exon Length: 2217**

TAA: | TGA: | TAG: | Exon: |

## Random Sequence ORF

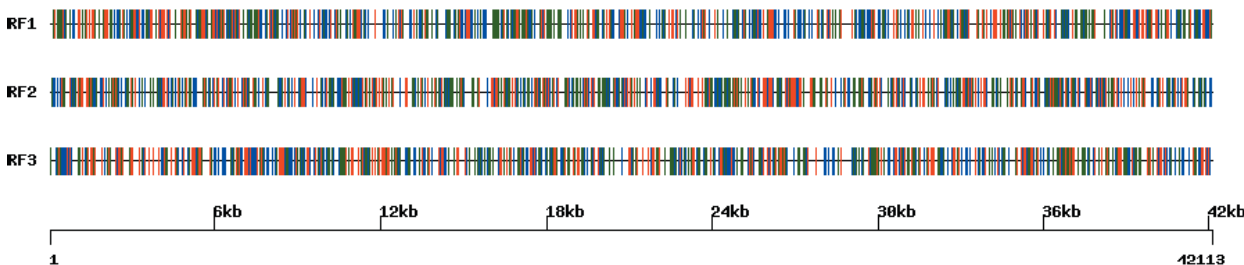

## Exon ORF (Before Splicing)

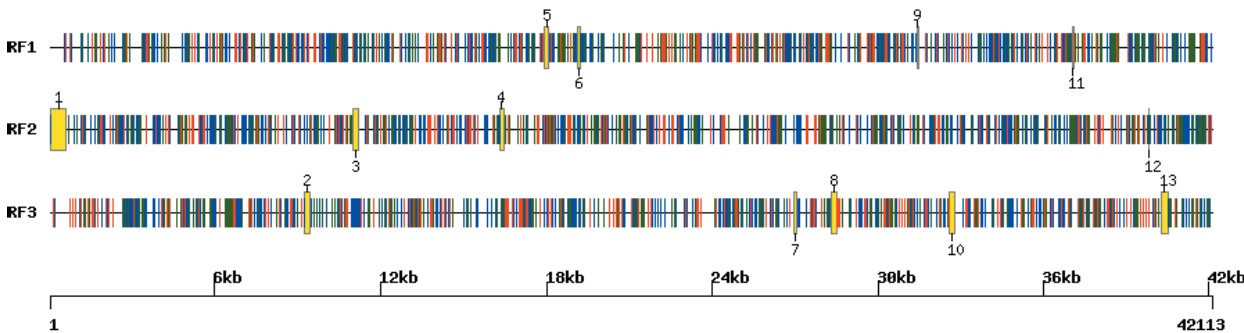

## Exon ORF (After Splicing)

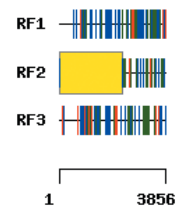

GTT : | ACA : | CTG : |

## Exon ARF (Before Splicing)

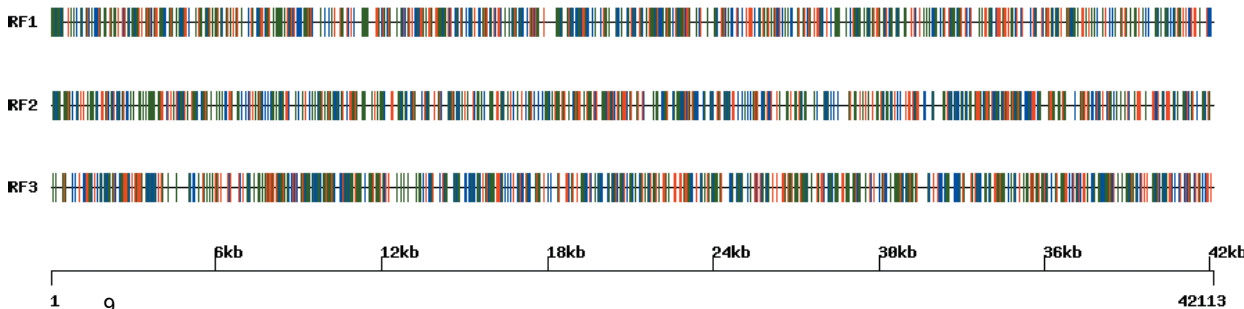

## Exon ARF (After Splicing)

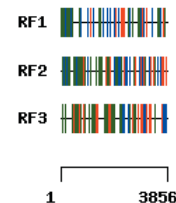

# Exon ORF Plot for Gene API5

[Genome: Homo sapiens]

[Gene Name: apoptosis inhibitor 5]

|                      |                   |     |    |    |     |     |                    |    |     |    |    |    |                     |    |
|----------------------|-------------------|-----|----|----|-----|-----|--------------------|----|-----|----|----|----|---------------------|----|
| Gene ID: <b>8539</b> | Gene Symbol: API5 |     |    |    |     |     | Gene Length: 32547 |    |     |    |    |    | Number of Exons: 14 |    |
| Exon                 | 1                 | 2   | 3  | 4  | 5   | 6   | 7                  | 8  | 9   | 10 | 11 | 12 | 13                  | 14 |
| Length               | 69                | 162 | 94 | 66 | 152 | 207 | 105                | 90 | 182 | 94 | 57 | 77 | 137                 | 23 |

**Total Spliced Exon Length: 1515**

TAA: | TGA: | TAG: | Exon: |

## Random Sequence ORF

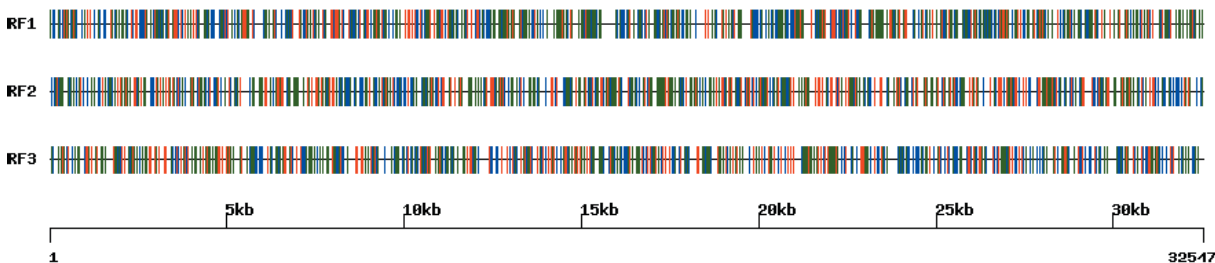

## Exon ORF (Before Splicing)

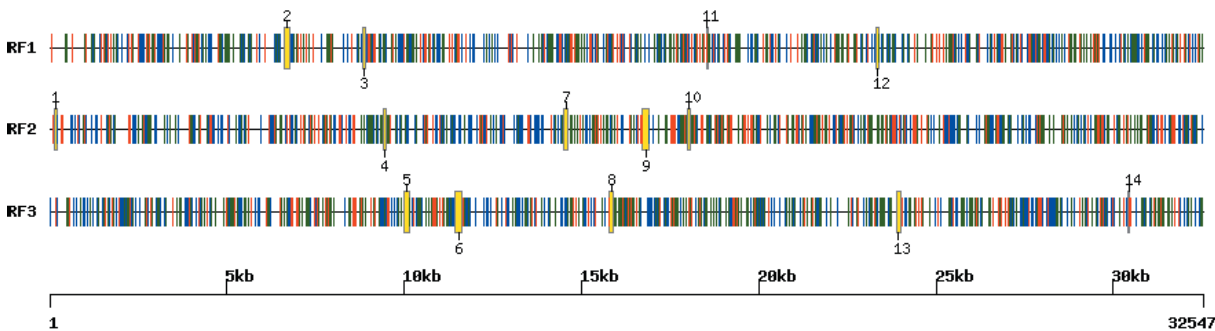

## Exon ORF (After Splicing)

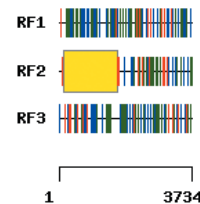

GTT : | ACA : | CTG : |

## Exon ARF (Before Splicing)

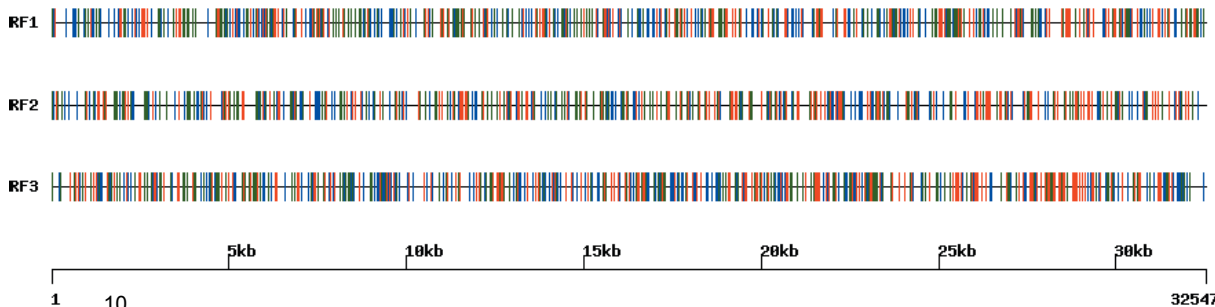

## Exon ARF (After Splicing)

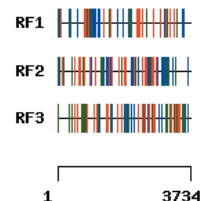

# Exon ORF Plot for Gene CTPS

[Genome: Homo sapiens]

[Gene Name: CTP synthase]

|                      |                   |     |     |     |    |    |     |     |    |    |                    |    |    |    |    |                     |    |
|----------------------|-------------------|-----|-----|-----|----|----|-----|-----|----|----|--------------------|----|----|----|----|---------------------|----|
| Gene ID: <b>1503</b> | Gene Symbol: CTPS |     |     |     |    |    |     |     |    |    | Gene Length: 32786 |    |    |    |    | Number of Exons: 17 |    |
| Exon                 | 1                 | 2   | 3   | 4   | 5  | 6  | 7   | 8   | 9  | 10 | 11                 | 12 | 13 | 14 | 15 | 16                  | 17 |
| Length               | 166               | 171 | 101 | 117 | 84 | 81 | 152 | 133 | 89 | 95 | 63                 | 44 | 97 | 56 | 97 | 145                 | 85 |

**Total Spliced Exon Length: 1776**

TAA: | TGA: | TAG: | Exon: |

## Random Sequence ORF

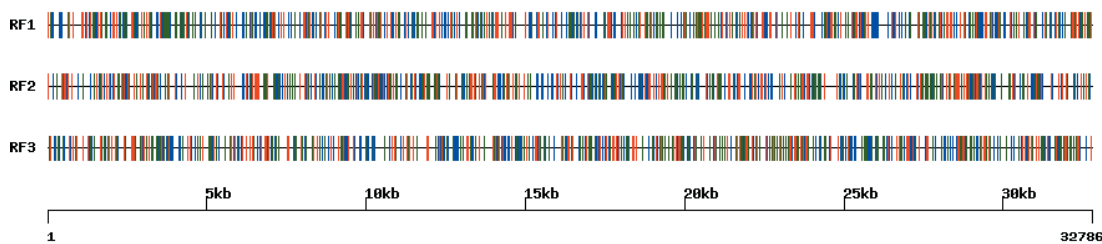

## Exon ORF (Before Splicing)

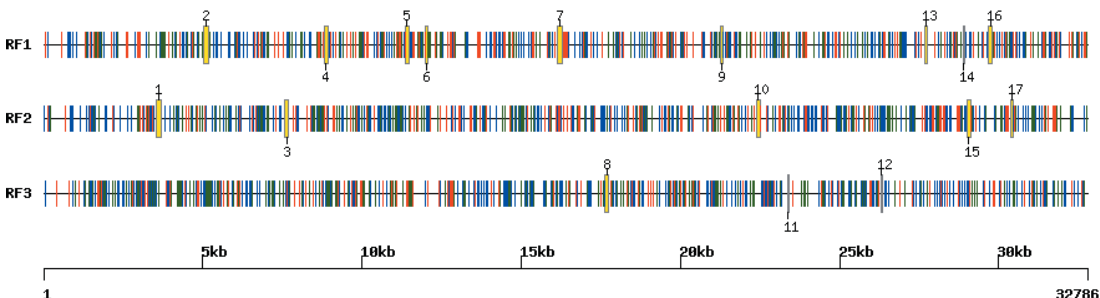

## Exon ORF (After Splicing)

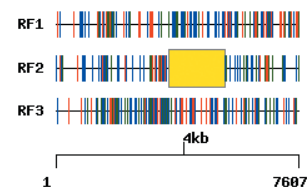

GTT : | ACA : | CTG : |

## Exon ARF (Before Splicing)

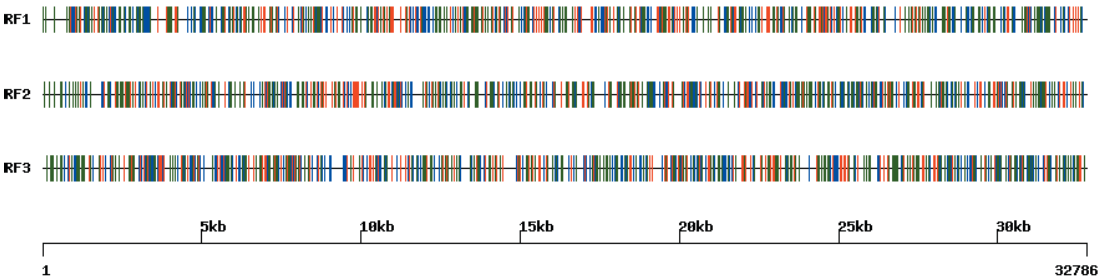

## Exon ARF (After Splicing)

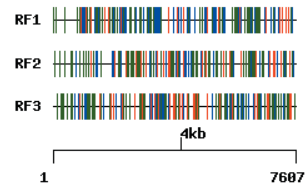

# Exon ORF Plot for Gene LIPF

[Genome: Homo sapiens]

[Gene Name: lipase, gastric]

|                      |                   |     |                    |     |                    |     |    |    |     |
|----------------------|-------------------|-----|--------------------|-----|--------------------|-----|----|----|-----|
| Gene ID: <b>8513</b> | Gene Symbol: LIPF |     | Gene Length: 14347 |     | Number of Exons: 9 |     |    |    |     |
| <b>Exon</b>          | 1                 | 2   | 3                  | 4   | 5                  | 6   | 7  | 8  | 9   |
| <b>Length</b>        | 105               | 118 | 199                | 110 | 137                | 147 | 72 | 72 | 237 |

**Total Spliced Exon Length: 1197**

TAA: | TGA: | TAG: | Exon: |

## Random Sequence ORF

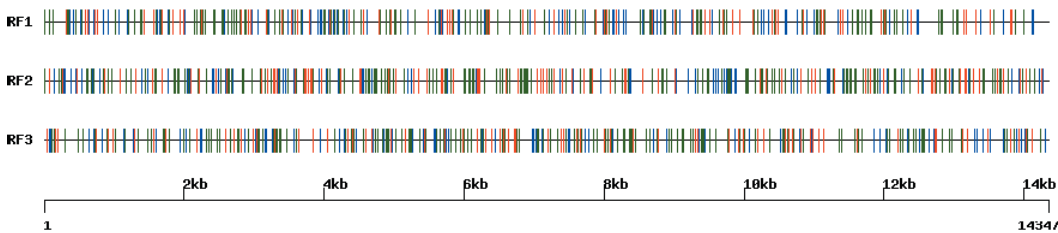

## Exon ORF (Before Splicing)

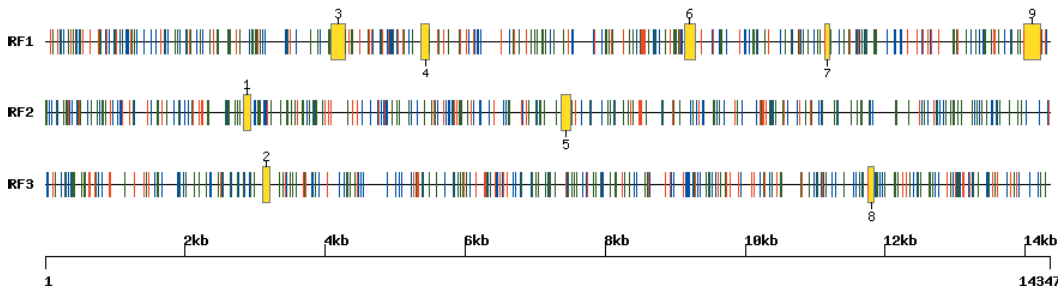

## Exon ORF (After Splicing)

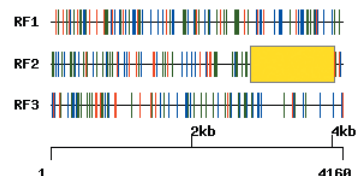

GTT : | ACA : | CTG : |

## Exon ARF (Before Splicing)

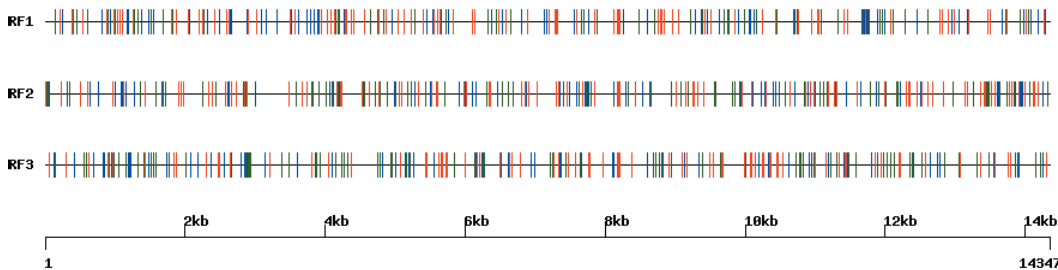

## Exon ARF (After Splicing)

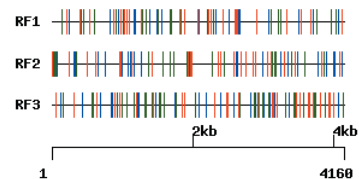

# Exon ORF Plot for Gene IFI44

[Genome: Homo sapiens]

[Gene Name: interferon-induced, hepatitis C-associated microtubular aggregat]

Gene ID: **10561**

Gene Symbol: IFI44

Gene Length: 14242

Number of Exons: 8

| Exon   | 1   | 2  | 3   | 4   | 5   | 6   | 7   | 8  |
|--------|-----|----|-----|-----|-----|-----|-----|----|
| Length | 457 | 37 | 196 | 150 | 172 | 101 | 175 | 47 |

**Total Spliced Exon Length: 1335**

TAA: | TGA: | TAG: | Exon: |

## Random Sequence ORF

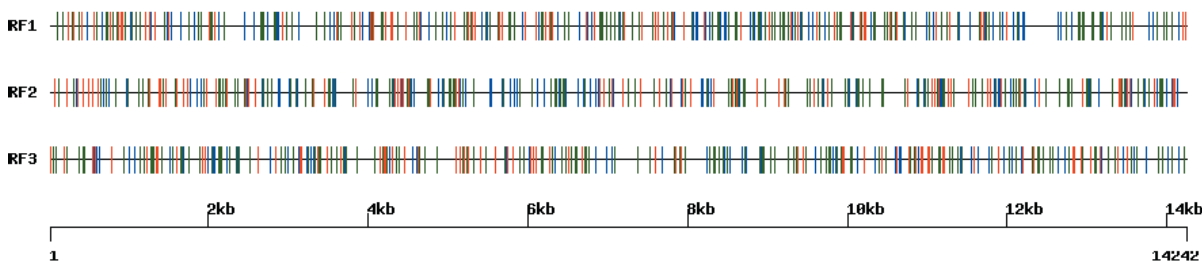

## Exon ORF (Before Splicing)

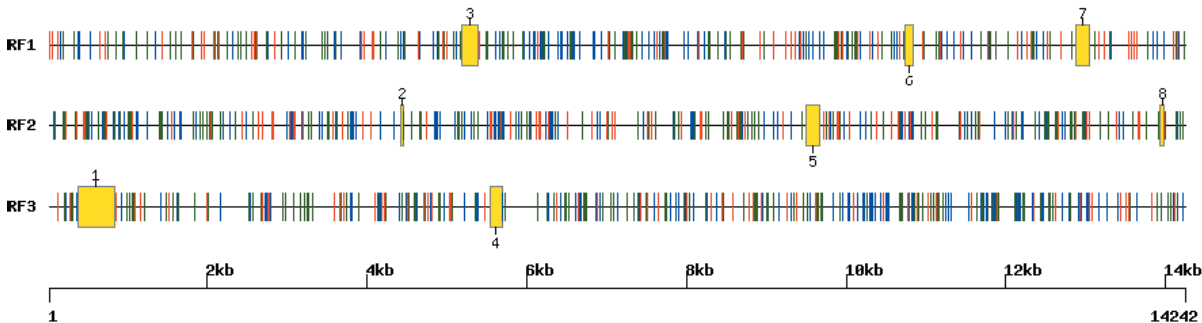

## Exon ORF (After Splicing)

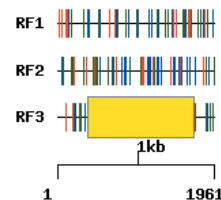

GTT : | ACA : | CTG : |

## Exon ARF (Before Splicing)

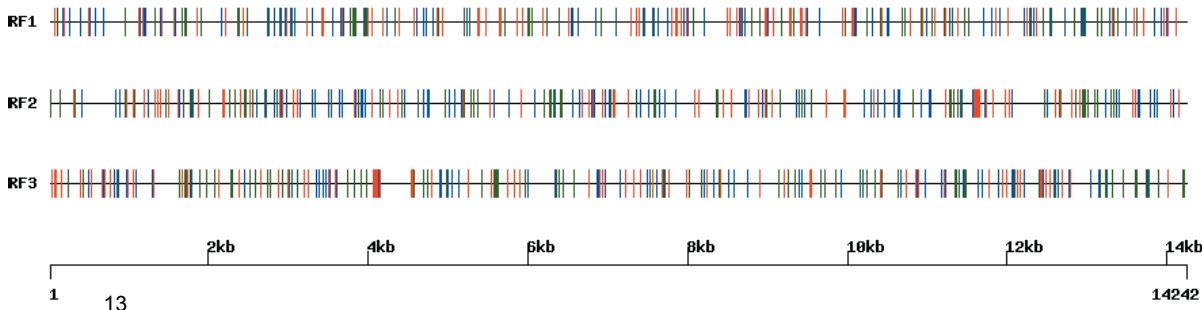

## Exon ARF (After Splicing)

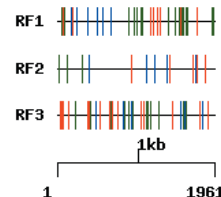

# Exon ORF Plot for Gene GBA

[Genome: Homo sapiens]

[Gene Name: glucocerebrosidase precursor]

|                      |                  |    |     |     |     |                    |     |     |     |     |                     |
|----------------------|------------------|----|-----|-----|-----|--------------------|-----|-----|-----|-----|---------------------|
| Gene ID: <b>2629</b> | Gene Symbol: GBA |    |     |     |     | Gene Length: 10246 |     |     |     |     | Number of Exons: 11 |
| <b>Exon</b>          | 1                | 2  | 3   | 4   | 5   | 6                  | 7   | 8   | 9   | 10  | 11                  |
| <b>Length</b>        | 27               | 88 | 192 | 147 | 134 | 173                | 238 | 225 | 164 | 117 | 106                 |

**Total Spliced Exon Length: 1611**

TAA: | TGA: | TAG: | Exon: |

## Random Sequence ORF

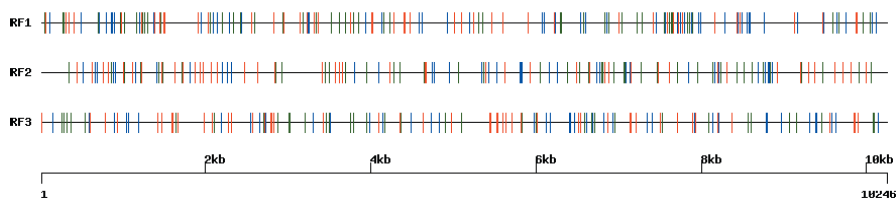

## Exon ORF (Before Splicing)

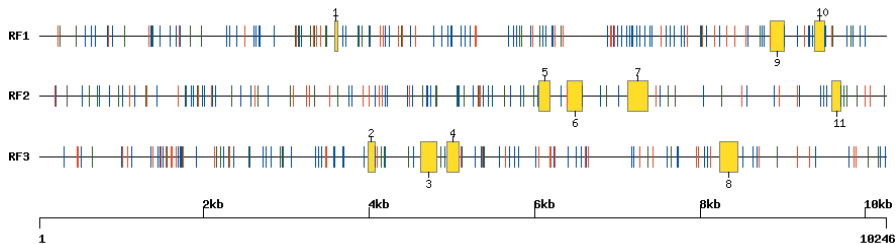

## Exon ORF (After Splicing)

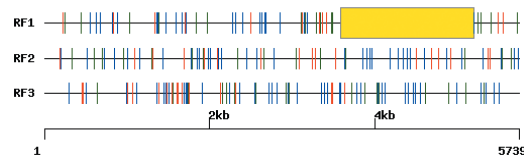

GTT : | ACA : | CTG : |

## Exon ARF (Before Splicing)

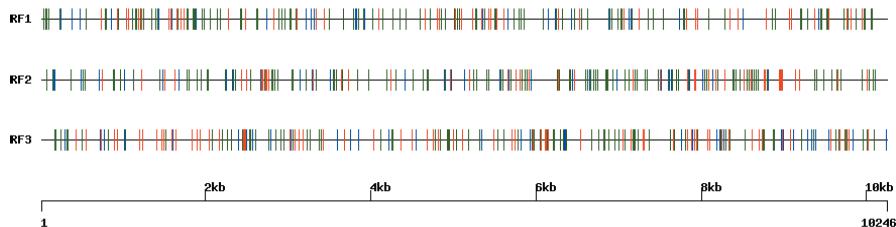

## Exon ARF (After Splicing)

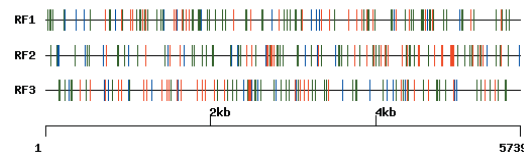

### **Representative invertebrate (*C. elegans*) genes**

EOPs of three representative *C. elegans* genes are displayed on pp. 16-18. *C. elegans* gene sequences are also very similar to random DNA with 99.95% of their ORFs being shorter than 750 bases. The ARFs in *C. elegans* genes also exhibit random characteristics. The vast majority of *C. elegans* exons (98%) are shorter than 750 bases, and >90% are shorter than 400 bases. Very rarely did the *C. elegans* exons not conform to the random sequence model. *C. elegans* genes are fairly intron dense, having an average of 5 introns per gene.

# Exon ORF Plot for Gene K08F4.1

[Genome: Caenorhabditis elegans]

[Gene Name: ]

Gene ID: **177879**

Gene Symbol: K08F4.1

Gene Length: 4525

Number of Exons: 11

| Exon   | 1  | 2   | 3   | 4   | 5   | 6   | 7   | 8   | 9   | 10  | 11  |
|--------|----|-----|-----|-----|-----|-----|-----|-----|-----|-----|-----|
| Length | 65 | 167 | 239 | 203 | 169 | 458 | 253 | 264 | 264 | 216 | 255 |

**Total Spliced Exon Length: 2553**

TAA: | TGA: | TAG: | Exon: |

## Random Sequence ORF

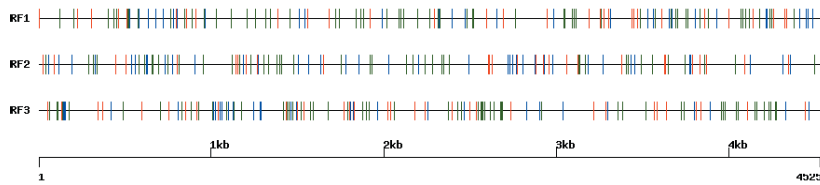

## Exon ORF (Before Splicing)

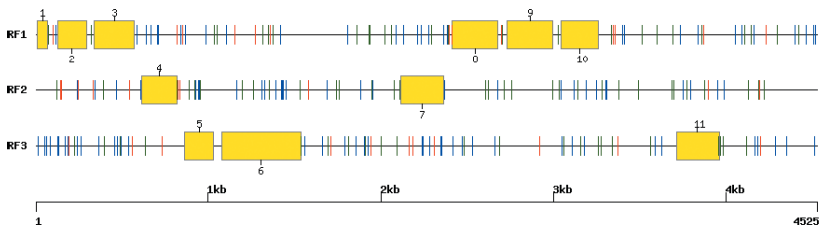

## Exon ORF (After Splicing)

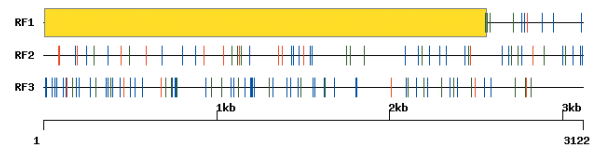

GTT : | ACA : | CTG : |

## Exon ARF (Before Splicing)

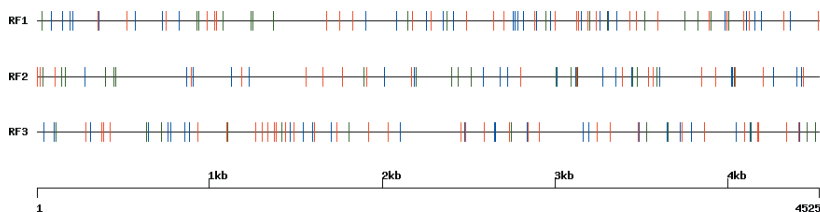

## Exon ARF (After Splicing)

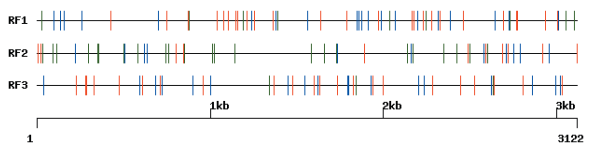



# Exon ORF Plot for Gene C34G6.1

[Genome: Caenorhabditis elegans]

[Gene Name: ]

|                        |                      |     |     |    |     |                    |     |     |     |     |                     |     |     |      |     |
|------------------------|----------------------|-----|-----|----|-----|--------------------|-----|-----|-----|-----|---------------------|-----|-----|------|-----|
| Gene ID: <b>172265</b> | Gene Symbol: C34G6.1 |     |     |    |     | Gene Length: 11071 |     |     |     |     | Number of Exons: 15 |     |     |      |     |
| <b>Exon</b>            | 1                    | 2   | 3   | 4  | 5   | 6                  | 7   | 8   | 9   | 10  | 11                  | 12  | 13  | 14   | 15  |
| <b>Length</b>          | 34                   | 152 | 313 | 82 | 220 | 525                | 376 | 192 | 814 | 103 | 171                 | 117 | 686 | 1264 | 258 |

**Total Spliced Exon Length: 5307**

TAA: | TGA: | TAG: | Exon: |

## Random Sequence ORF

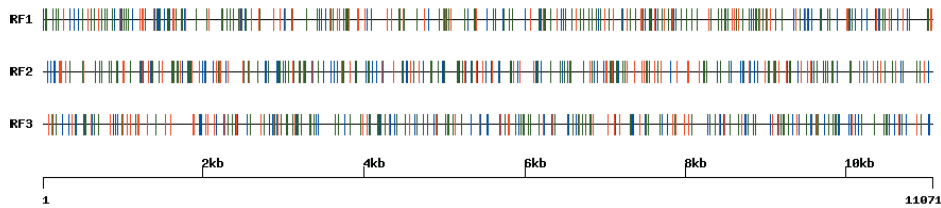

## Exon ORF (Before Splicing)

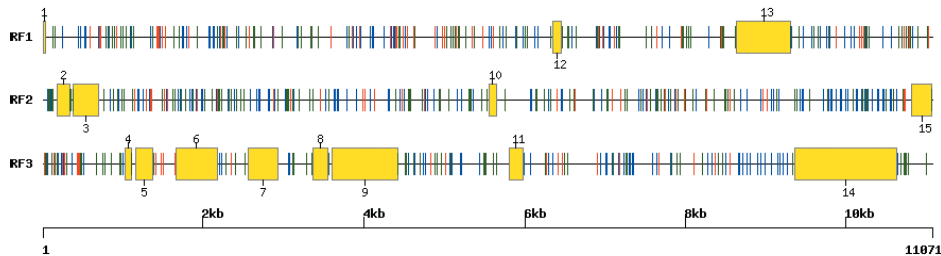

## Exon ORF (After Splicing)

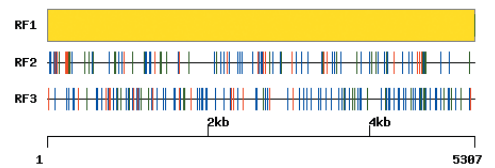

GTT : | ACA : | CTG : |

## Exon ARF (Before Splicing)

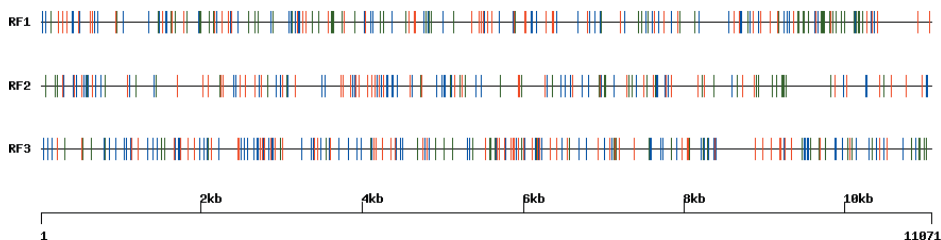

## Exon ARF (After Splicing)

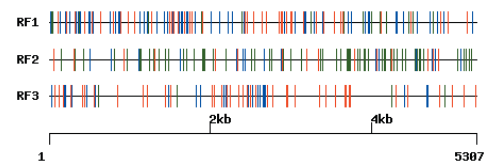

# Exon ORF Plot for Gene F23F12.13

[Genome: Caenorhabditis elegans]

[Gene Name: ]

Gene ID: **3896740**

Gene Symbol: F23F12.13

Gene Length: 2497

Number of Exons: 9

| Exon   | 1  | 2  | 3   | 4   | 5   | 6   | 7   | 8   | 9   |
|--------|----|----|-----|-----|-----|-----|-----|-----|-----|
| Length | 90 | 80 | 254 | 146 | 131 | 319 | 157 | 102 | 308 |

**Total Spliced Exon Length: 1587**

TAA: | TGA: | TAG: | Exon: |

## Random Sequence ORF

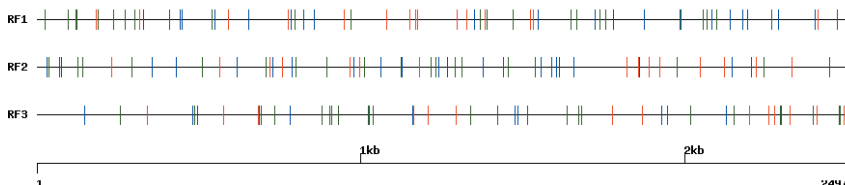

## Exon ORF (Before Splicing)

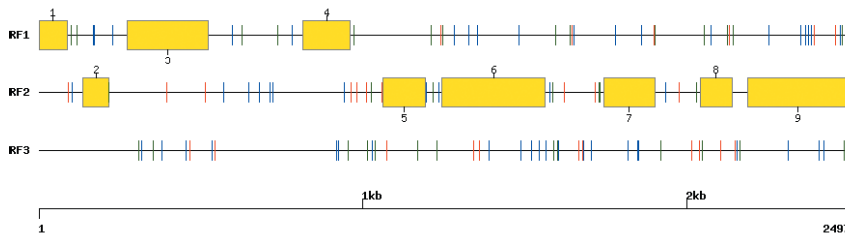

## Exon ORF (After Splicing)

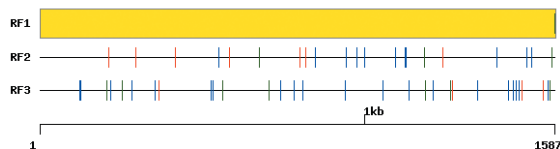

GTT : | ACA : | CTG : |

## Exon ARF (Before Splicing)

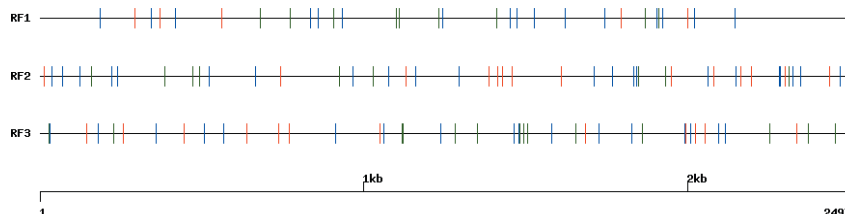

## Exon ARF (After Splicing)

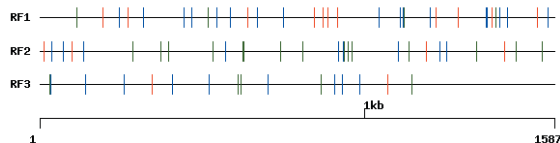

### **Representative parasitic protist (*P. falciparum*) genes**

EOPs of two representative *P. falciparum* genes are displayed on pp. 20-21. *P. falciparum* gene sequences are non-random only with respect to the lengths of a small subset of ORFs that specifically contain the non-conforming exons of genes. The ARFs in *P. falciparum* genes exhibit random characteristics. Nearly all, 99.87%, of the ORFs in *P. falciparum* genomes are shorter than 750 bases, and 69% of exons are shorter than 750 bases. The 31% non-conforming *P. falciparum* exons occur conspicuously within the rarely occurring non-conforming ORFs against a background of random ORFs, indicating that these must have been derived from splicing of short exons. *P. falciparum* genes have a relatively low density of introns (with average of 1 intron per gene) compared to *H. sapiens*, *A. thaliana* and *C. elegans*.

# Exon ORF Plot for Gene PFB0365w

[Genome: Plasmodium falciparum]

[Gene Name: hypothetical protein]

Gene ID: **812673**      Gene Symbol: PFB0365w      Gene Length: 7272      Number of Exons: 16

| Exon   | 1  | 2  | 3  | 4   | 5  | 6  | 7  | 8  | 9   | 10  | 11 | 12 | 13  | 14 | 15 | 16   |
|--------|----|----|----|-----|----|----|----|----|-----|-----|----|----|-----|----|----|------|
| Length | 90 | 37 | 92 | 124 | 69 | 74 | 62 | 73 | 110 | 263 | 92 | 43 | 235 | 78 | 70 | 3894 |

**Total Spliced Exon Length: 5406**

TAA: | TGA: | TAG: | Exon: |

## Random Sequence ORF

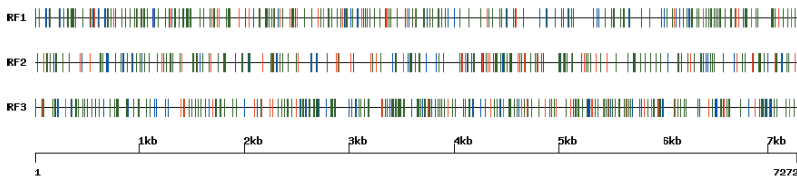

## Exon ORF (Before Splicing)

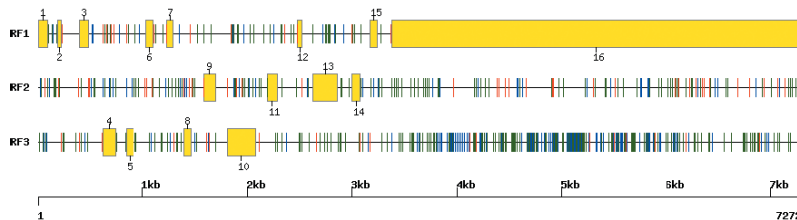

## Exon ORF (After Splicing)

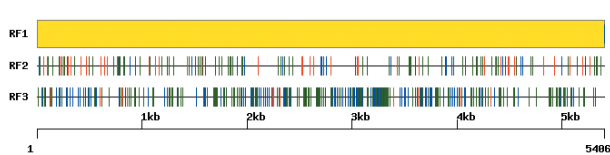

GTT : | ACA : | CTG : |

## Exon ARF (Before Splicing)

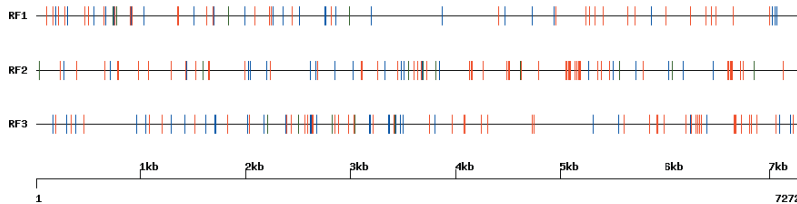

## Exon ARF (After Splicing)

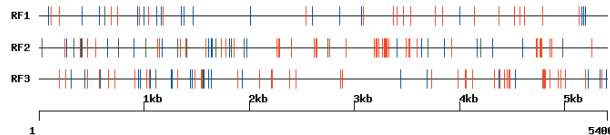

# Exon ORF Plot for Gene PFC0990c

[Genome: Plasmodium falciparum]

[Gene Name: hypothetical protein]

|                        |                       |      |    |    |    |    |                   |    |     |    |    |    |                     |     |
|------------------------|-----------------------|------|----|----|----|----|-------------------|----|-----|----|----|----|---------------------|-----|
| Gene ID: <b>814536</b> | Gene Symbol: PFC0990c |      |    |    |    |    | Gene Length: 3819 |    |     |    |    |    | Number of Exons: 14 |     |
| <b>Exon</b>            | 1                     | 2    | 3  | 4  | 5  | 6  | 7                 | 8  | 9   | 10 | 11 | 12 | 13                  | 14  |
| <b>Length</b>          | 46                    | 1307 | 42 | 90 | 86 | 82 | 65                | 63 | 152 | 47 | 35 | 55 | 58                  | 134 |

**Total Spliced Exon Length: 2262**

TAA: | TGA: | TAG: | Exon: |

## Random Sequence ORF

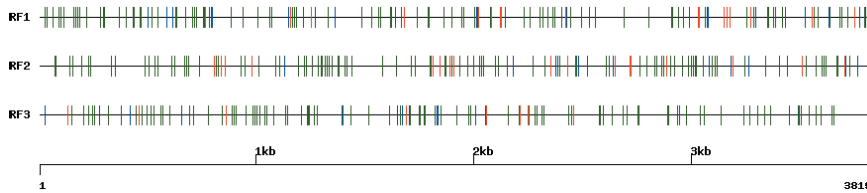

## Exon ORF (Before Splicing)

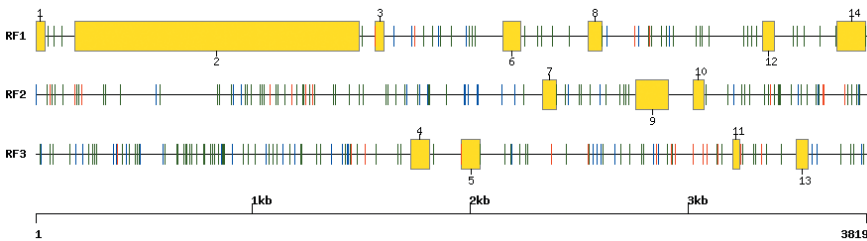

## Exon ORF (After Splicing)

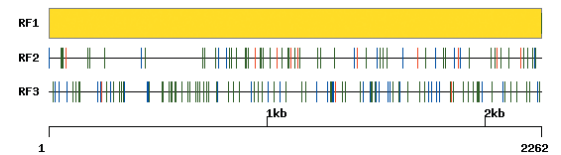

GTT : | ACA : | CTG : |

## Exon ARF (Before Splicing)

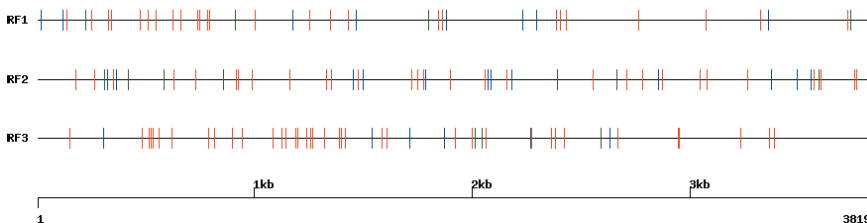

## Exon ARF (After Splicing)

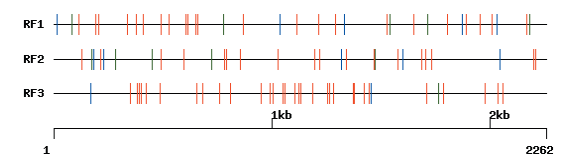

### **Representative yeast (*S. pombe*) genes**

EOPs of two representative *S. pombe* genes are displayed on pp. 23-24. *S. pombe* gene sequences are non-random only with respect to the lengths of the small subset of ORFs that specifically contain the non-conforming exons. The ARFs in *S. pombe* genes do exhibit random characteristics. Nearly all, 99.77%, of the ORFs in *S. pombe* genomes are shorter than 750 bases, and 67% of their exons are shorter than 750 bases. The remaining 33% of non-conforming *S. pombe* exons occur conspicuously within the rarely occurring non-conforming ORFs against a background of random ORFs, indicating that these must have been derived from splicing of short exons. Of the eukaryote genomes we examined, *S. pombe* genes had the lowest density of introns (with an average of 1 intron per gene).

# Exon ORF Plot for Gene cdc5

[Genome: Schizosaccharomyces pombe]

[Gene Name: hypothetical protein]

Gene ID: **2543583**

Gene Symbol: cdc5

Gene Length: 2577

Number of Exons: 6

| Exon   | 1  | 2  | 3  | 4   | 5   | 6    |
|--------|----|----|----|-----|-----|------|
| Length | 19 | 20 | 15 | 120 | 449 | 1651 |

**Total Spliced Exon Length: 2274**

TAA: | TGA: | TAG: | Exon: |

## Random Sequence ORF

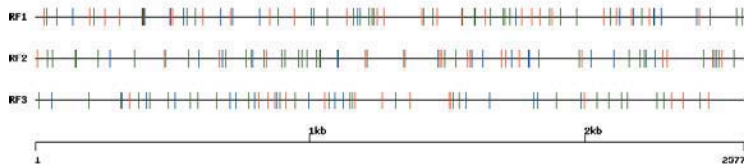

## Exon ORF (Before Splicing)

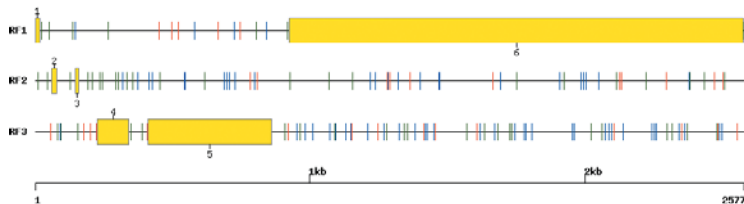

## Exon ORF (After Splicing)

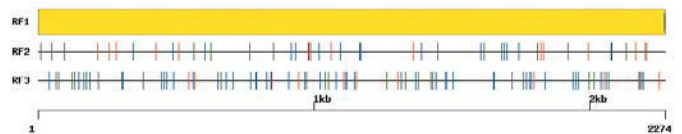

GTT : | ACA : | CTG : |

## Exon ARF (Before Splicing)

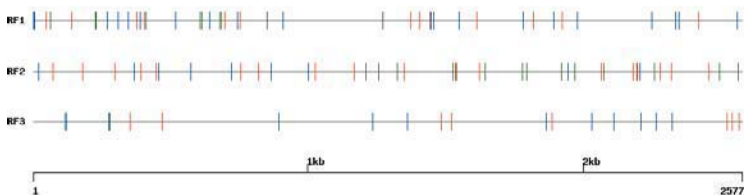

## Exon ARF (After Splicing)

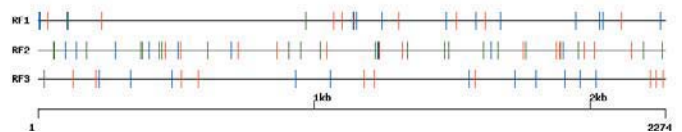

## Exon ORF Plot for Gene cki2

[Genome: Schizosaccharomyces pombe]

[Gene Name: serine/threonine protein kinase]

Gene ID: **2541341**

Gene Symbol: cki2

Gene Length: 1492

Number of Exons: 4

| Exon   | 1   | 2  | 3   | 4   |
|--------|-----|----|-----|-----|
| Length | 126 | 70 | 149 | 963 |

**Total Spliced Exon Length: 1308**

TAA: | TGA: | TAG: | Exon: |

### Random Sequence ORF

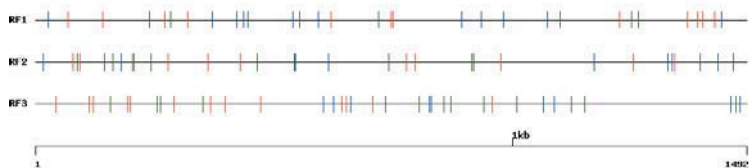

### Exon ORF (Before Splicing)

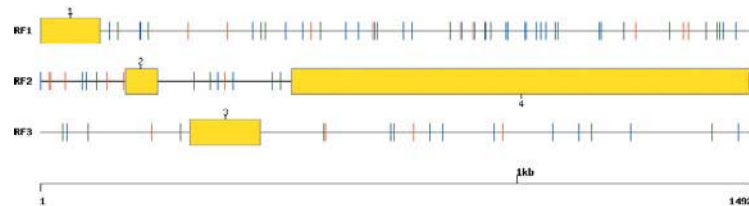

### Exon ORF (After Splicing)

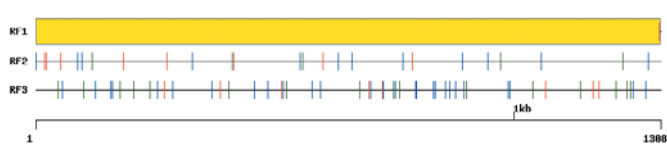

GTT : | ACA : | CTG : |

### Exon ARF (Before Splicing)

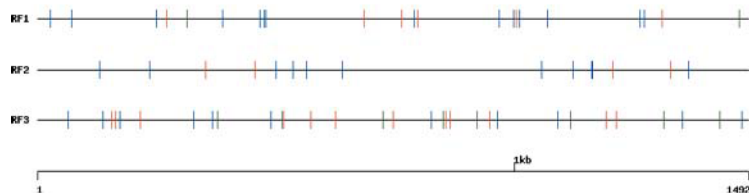

### Exon ARF (After Splicing)

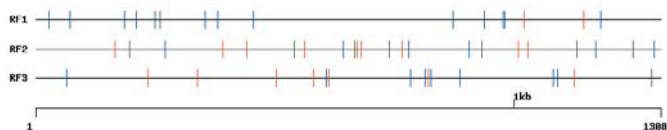



### **Representative bacterial (*E. coli*) genes**

EOPs of two representative *E. coli* genes are displayed on pp. 26-27. *E. coli* gene sequences are non-random only with respect to the lengths of the small subset of ORFs that specifically contain the non-conforming coding sequences of their genes. The ARFs in *E. coli* genes exhibit clearly random characteristics. We found that 99.2% of the ORFs in the *E. coli* genome are shorter than 750 bases, and that 43% of their coding sequences are shorter than 750 bases. Distinct from the eukaryotes, a majority of the *E. coli* coding sequences (57%) did not conform to the random sequence model. All of the non-conforming coding sequences in the *E. coli* genome were contained within the 0.8% non-conforming ORFs. *E. coli* genes lack introns altogether. Consistent with these observations, the *E. coli* genome is the smallest of those examined, and contains only contiguously coding genes without introns or intergenic sequences.

# Exon ORF Plot for Gene ackA

[Genome: Escherichia coli K12]

[Gene Name: acetate/propionate kinase]

Gene ID: 946775

Gene Symbol: ackA

Gene Length: 1203

TAA: | TGA: | TAG: | Exon: |

## Random Sequence ORF

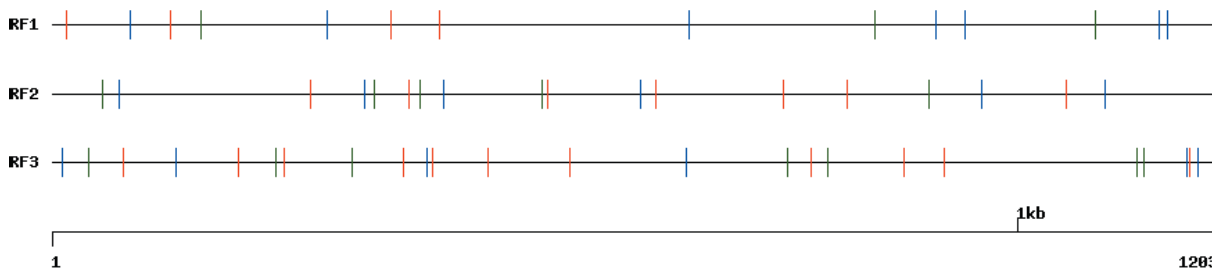

## Gene ORF

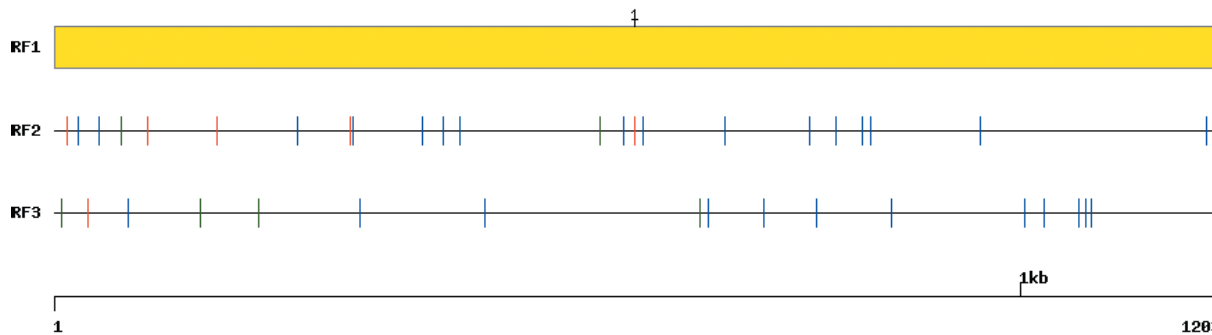

GTT : | ACA : | CTG : |

## Gene ARF

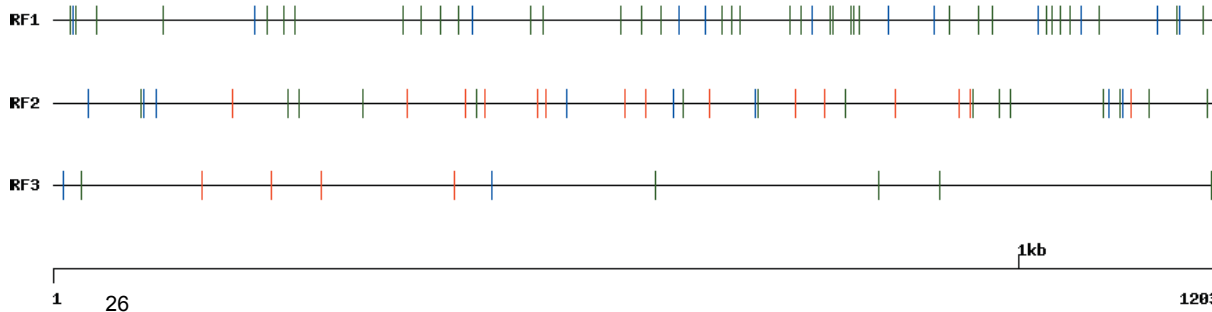

# Exon ORF Plot for Gene *acrB*

[Genome: Escherichia coli K12]

[Gene Name: multidrug efflux system protein]

Gene ID: **945108**

Gene Symbol: *acrB*

Gene Length: 3150

TAA: | TGA: | TAG: | Exon: |

## Random Sequence ORF

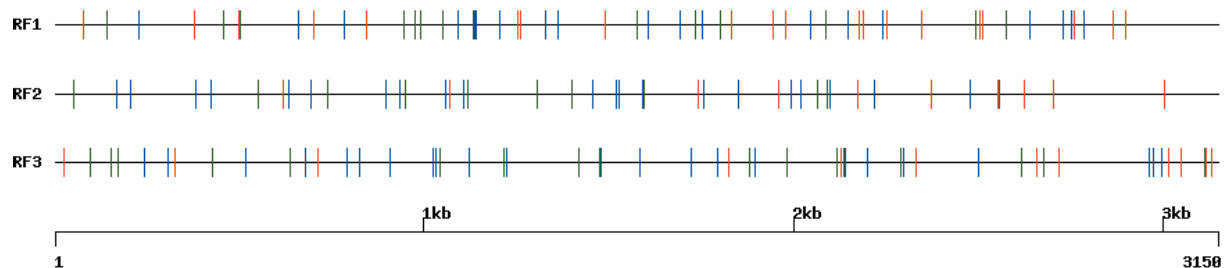

## Gene ORF

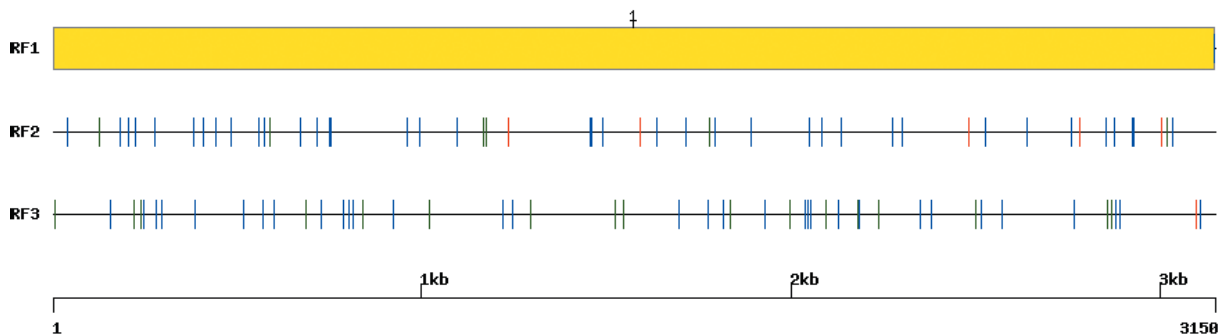

GTT : | ACA : | CTG : |

## Gene ARF

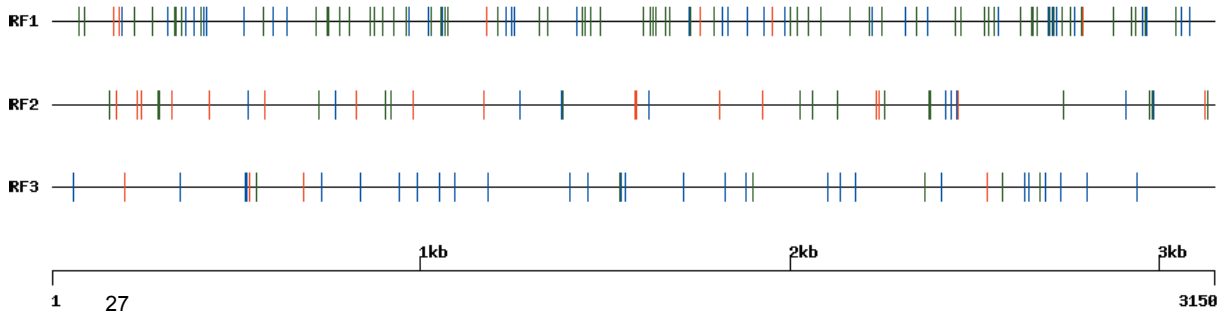

Supplement: pone.0003456.s003.pdf [file pone.0003456.s003.pdf]
