# Supplementary material for: Origination of the Split Structure of Spliceosomal Genes from Random Genetic Sequences
Source: PubMed Central journal article supplement (PMC2565106; doi:10.1371/journal.pone.0003456), 2008-10-20
Supplement: pone.0003456.s002.pdf [file pone.0003456.s002.pdf]

## SUPPLEMENTARY TABLE

**TABLE S1: High frequencies of stop codons at exon borders in the human genome.**

| CODON  | Acceptor Splice Site (-3 position) |         | Donor Splice Site (+2 position) |         |
|--------|------------------------------------|---------|---------------------------------|---------|
|        | Count                              | Percent | Count                           | Percent |
| TGA    | 13                                 | 0.005   | 76617                           | 28.02   |
| TAA    | 7                                  | 0.003   | 103427                          | 37.83   |
| TAG    | 76969                              | 28.15   | 20047                           | 7.33    |
| CAG    | 178350                             | 65.23   | 218                             | 0.08    |
| SBD    | 16936                              | 6.19    | 67157                           | 24.56   |
| OTHERS | 1147                               | 0.42    | 5961                            | 2.18    |
| TOTAL  | 273422                             | 99.99   | 273424                          | 100     |

All of the available data for human exons (273,426) were examined.

SBD: codons which differ from stop codons by a single base.
